1 **Toward Health Management of Major Labour Force Generation by Using**  
2 **Infection Control Countermeasures for Haematobium Schistosomiasis –**  
3 **assumed to be related to occupational risk- in the Republic of Malawi**

4

5 Nobuyuki Mishima, Samuel K. Jemu, Tomoaki Kuroda, Koichiro Tabuchi, Andrew W. Darcy, Takaki  
6 Shimono, Pheophet Lamaningao, Mari Miyake, Seiji Kanda, Susan Ng'ambi, Yoshihiro Komai, Hirofumi  
7 Maeba, Hiroyuki Amano, and Toshimasa Nishiyama

8

9 **Department of Hygiene and Public Health, Kansai Medical University, Osaka, Japan:** N. Mishima  
10 MD, T. Kuroda MD, K. Tabuchi MD, Andrew W. Darcy, T. Shimono PhD, P. Lamaningao PhD, M.  
11 Miyake PhD, S. Kanda PhD, H. Amano MD, PhD, T. Nishiyama MD, PhD

12 **Center for Travel Medicine, Kansai Medical University Medical Center, Osaka, Japan:** N. Mishima  
13 MD, T. Kuroda MD, K. Tabuchi MD, T. Nishiyama MD, PhD

14 **Department of Urology, Kansai Medical University, Osaka, Japan:** Y. Komai MD, PhD

15 **Maeba Clinic, Osaka, Japan:** H. Maeba MD, PhD

16 **Community Health Science Unit, Ministry of Health, Lilongwe, Republic of Malawi:** S.K. Jemu EH,  
17 ADCHD, MCHD

18 **Kamuzu Central Hospital, Lilongwe, Republic of Malawi:** Susan Ng'ambi

19

20 Corresponding author: Nobuyuki Mishima

21 **Email:** [shijiediyi\\_galifan@me.com](mailto:shijiediyi_galifan@me.com)

22

23 **Abstract**

24 **Background:** In Malawi, haematobium schistosomiasis is highly endemic. According to previous studies,  
25 countermeasures have been conducted mainly in school-aged children. In this study, we focused on the  
26 age groups, which are assumed to be major labour force generation. Haematobium schistosomiasis is  
27 supposed to be related to occupational activities in schistosome endemic countries.

28 **Methods:** We chronologically followed the transition of schistosome egg positive prevalence before and  
29 after mass drug administration of praziquantel (MDA) by using a urine filtering examination. We also  
30 analyzed the effectiveness of urine reagent strips from the cost perspective.

31 **Findings:** The egg positive prevalence was 34.3% (95%CI: 28.5-40.5) just before MDA in June 2010 and  
32 the highest prevalence was in the age of twenties. The egg positive prevalence reduced to 12.7% (95%CI:  
33 9.2-17.3,  $p < 0.01$ ) eight weeks after the first MDA and the prevalence reduced to 6.9% (95%CI: 4.6-10.0,  
34  $p < 0.01$ ) after the second MDA in August 2011. The egg positive prevalence after MDA in 2013 was  
35 reduced from 3.8% (95%CI: 2.1-6.9) to 0.9% (95%CI: 0.3-3.4) and  $p$  value was 0.050. Using urine  
36 reagent strips after MDA, the positive predictive value decreased, but the negative predictive value  
37 remained high. The cost of one urine reagent strip and one tablet of praziquantel were US\$0.06 and  
38 US\$0.125 in 2013 in Malawi. If the egg positive prevalence is 40%, screening subjects for MDA using

39 urine reagent strips, the cost reduction can be estimated to be about 24% -showing an overall cost  
40 reduction.

41 **Conclusion:** The combination of MDA and urine reagent strips could be both a practical and  
42 cost-effective countermeasure for haematobium schistosomiasis. It is key to recognize that haematobium  
43 schistosomiasis could be considered a disease that is assumed to have some concern with occupational  
44 risk in tropical agricultural countries such as Malawi. From this point of view, it is very important to  
45 protect the health of workers; the sound labour force generation is vital for economic growth and  
46 development in these countries.

47

## 48 **Author summary**

49 Schistosomiasis is widely endemic in the tropical and subtropical countries including Malawi, and it is  
50 related that more than 300 million people suffer from associated severe morbidity. The pathway of  
51 transmission is mainly contacting infested fresh water and it is inevitable to contact fresh water through  
52 their daily activities in Malawi. Then, they are routinely exposed to the risk of schistosome infection.  
53 Previously the main targets of schistosome control were school-aged children, but our research showed  
54 main population of schistosome infection was twenties that was presumed to be major labour force.  
55 Agriculture is the dominant industry in Malawi and it can be related to be at risk of schistosome infection  
56 during agricultural work. Schistosomiasis is presumed to have occupation-related risks, we consider that  
57 schistosome control will be a valuable step-up to economic development and make a social contribution  
58 in Malawi and many low-income tropical countries.

59

60 **Funding:** The Ministry of Education, Culture, Sports, Science and Technology of Japan's scientific  
61 research grant ([JSPS KAKENHI Grant Number JP23406025](#)). The funders had no role in study design,  
62 data collection and analysis, decision to publish, or preparation of the manuscript.

63

64 **Keywords:** Haematobium schistosomiasis, Occupational risk, Labour health management, Economic  
65 growth, Urine reagent strips, Malawi

66

## 67 **Introduction**

68 Schistosomiasis, a trematode infectious disease, is widely distributed around the tropics and subtropics.  
69 This infectious disease is one of the world's three major parasitic infections. It is endemic in 74  
70 developing countries; and approximately 800 million people are at risk of schistosome infection. More  
71 than 300 million people suffer from associated severe morbidity [1]. Chronic and repeat infection of  
72 schistosomiasis could result in irreversible damage to body organs and other diseases; for example,  
73 *Schistosoma haematobium* infection may lead to bladder cancer and cervical cancer [2, 3]. In the  
74 schistosome endemic regions, the most prevalent form of the disease is chronic schistosomiasis, resulting  
75 from repeated exposure to infectious cercariae [4]. Schistosomiasis mortality rates rises substantially as  
76 age increases [5]. Therefore, it is important for healthcare systems to consider not only children but also

77 young adults –assumed to be a major component of labour generation- as the subjects of schistosomiasis  
78 control as related to occupational risk.

79 Schistosomiasis is recognized as one of the neglected tropical diseases (NTDs) at present. Global  
80 coverage rate of preventive chemotherapy against schistosomiasis is still low at 8.3%, while the rate  
81 against onchocerciasis is 59.8% [1]. In sub-Saharan Africa, approximately 280,000 annual deaths have  
82 been attributed to schistosomiasis [6]. Countermeasures have been globally to fight malaria, tuberculosis,  
83 and HIV infection; however, we consider provisions against schistosomiasis are an important next step  
84 for the sustainable growth and development in countries affected by schistosomiasis because of the  
85 burden the disease places on those living in the affected region. This disease does not only cause  
86 immediate morbidity in children, but it also has long-term health effects on the children’s development  
87 into adulthood. Although the earlier studies targeted school-aged children, but the disease may become a  
88 matters of concern for the general public if the overall labour force suffers from schistosomiasis.

89 Malawi is one of the poorest countries in the world and was ranked as the ninth poorest country in  
90 terms of GDP per capita in 2009 that stood at US\$290 [7]. And it is still US\$300.79 in 2016 on the list of  
91 World Bank. Malawi is an endemic country of schistosomiasis and schistosomiasis is associated with  
92 populations living in poverty in sub-Saharan Africa, including Malawi. In order to ameliorate poverty, it  
93 is important to improve the working environment; and managing the health of the working population is  
94 very important to establish a stable and sustainable economic environment. From the viewpoint of labour  
95 healthcare management, controlling schistosomiasis could be one of the most effective countermeasures  
96 for those countries affected by schistosomiasis. There are few researches that have taken measures against  
97 schistosomiasis from the viewpoint of occupational risk.

98 In Malawi, the main pathogens are *Schistosoma haematobium* and *S. mansoni*. Schistosomiasis is  
99 transmitted through contact with infected freshwater in which these intermediate hosts live. The two  
100 intermediate hosts distribute simultaneously. *Bulinus globosus*, the main intermediate host, is distributed  
101 all over the country-especially where there are sources of freshwater, such as sugarcane plantations, rice  
102 growing schemes, man-made dams, rivers, and ponds. While the genus *Biomphalaria* occurs in Lilongwe  
103 and the Linthipe Plain, Chapanaga area in Chinkhwawa district; some parts of Ntchisi, Salima, Karonga,  
104 Namwera in Mangochi, and Blantyre. It is reported that schistosomiasis is more rampant in poor rural  
105 communities especially places where fishing and agricultural activities are dominant [8]. The pathway of  
106 schistosome transmission notably affects farmers, fishermen, irrigation workers, and those whose daily  
107 activities involve contact with infested freshwater. Contact with freshwater is the inextricable part of the  
108 daily activities of many inhabitants in the area. Malawi is predominantly an agricultural country and  
109 agriculture accounts for about 35% of GDP. Moreover agricultural activities provide more than 80% of  
110 the employment in this country [7]; therefore, the vast majority of the population is routinely exposed to  
111 the possibility of schistosome infection while working. As a result of this situation, we need to recognize  
112 that there could be the occupational risk in suffering from schistosomiasis. The prevalence of the disease  
113 in the country is estimated between 40% and 50%; school-aged children are a highly infected group and  
114 are intensely affected [9]. It was previously reported that although all sections of the population in the

115 endemic areas can be infected with schistosomiasis, the most vulnerable groups are pre-school (under 5  
116 years old) and school-aged children, adolescent girls, and women of childbearing age [10, 11].  
117 Haematobium schistosomiasis is likely to impact child growth and possibly can cause anemia in all age  
118 groups; this would call for the inclusion of the entire populations into future control programs [12].

119 In this study, which looks at schistosomiasis that could have relation to occupational risk, we targeted  
120 residents of all generations, including major segments of the labour force to check the current status of  
121 residents in our surveyed areas using mass drug administration of praziquantel (MDA) and urinalysis.  
122 Protecting the health of the labour force can be expected to contribute to the economic growth and  
123 development of Malawi. Findings from our study should also help other tropical and subtropical  
124 schistosome endemic countries.

125

## 126 **Methods**

### 127 **Study area and population**

128 A survey was conducted in twelve contiguous villages with similar socio-economic and cultural  
129 characteristics in Nkhosakota District located on the shores of Lake Malawi from June 2010 to August  
130 2011. The total population surveyed was 1,810 people, more than 4 years old. Around 300 subjects were  
131 selected by random sampling for urine examinations. I threw a Japanese 10 - yen coin and chose the  
132 participants who got the head of a coin in order. The inhabitants of these villages were predominantly  
133 subsistence farmers of maize and rice and river/swamp fishermen. The communities had one primary  
134 school and functional boreholes. The people can access a healthcare center by walking a few hours.  
135 Schools provided health education for the prevention of schistosomiasis.

136 In 2012 a second survey was conducted. Four target areas in the Lilongwe District were selected where  
137 previously we had conducted mass drug administration using praziquantel for all the residents more than  
138 4 years old in 2012 with the help of the Malawi Ministry of Health (Community Health Science Unit).  
139 These four target areas were Chisindo, Mtika, Mapiri, and Chisaka in Lilongwe. The total population was  
140 1,393 people in these four areas, and around 300 subjects were selected by random sampling from among  
141 all age groups. The target areas were located near the capital Lilongwe, the basic infrastructure was being  
142 developed to some extent. Health education for schistosome infection had been provided at the schools.  
143 Information about schistosomiasis was also provided via broadcast media.

144

### 145 **Urine examination survey**

146 A list of registered inhabitants (1,810 people) was prepared by a door-to-door survey in April 2010. In  
147 June 2010, 242 participants were identified; then 260 people in August 2010; 315 people in June 2011;  
148 and later 350 people in August 2011. We distributed instruction on urine examination written in  
149 Chichewa (Malawian domestic language) to all participants and then they received explanation on urine  
150 examination in Chichewa from the Malawi Ministry of Health staff. After finishing the questions and  
151 answers about the explanation more than one hour, only those who agreed to the examination were  
152 selected as the participants. We got the informed consents in writing by them. The participants provided

153 their urine samples and with a urine test administered among randomly sampled subjects. In 2013, 264  
154 people in June and later 211 people in August were among randomly selected subjects who participated in  
155 our urine examination survey. We examined all urine samples provided from all participants, regardless  
156 of age. The urinalysis was performed twice in a year; the first was done immediately before mass drug  
157 administration of praziquantel and the second analysis was performed 8 weeks after the administration  
158 [13]. The freshly passed mid-day urine samples were collected from 10 am to 2 pm, and were screened  
159 for microhaematuria and proteinuria using urine reagent strips (SD UroColor 11, Standard Diagnostics  
160 Inc., Korea). The urine reagent strips were used according to the manufacturer's instructions and all strips  
161 were checked in about thirty seconds. The specimens were then processed for microscopic examination of  
162 schistosome eggs at the site of the collection within three hours.

163 Processing the specimen and egg detecting followed the syringe filtration technique. A urine subsample  
164 of 10mL was drawn into a plastic syringe from each well-mixed sample and strained through a nylon  
165 filter (12 µm pore size: Disease Control Textiles, Vestergaard Frandsen Group, Denmark). The filter was  
166 then examined under the microscope with magnification of x100, and *S. haematobium* eggs were  
167 detected.

168

### 169 **Mass drug administration**

170 After the urine examinations were completed, we provided the information of praziquantel (E. Merck  
171 KG) written in Chichewa to all villagers. They received explanation on the drug in Chichewa from the  
172 Malawi Ministry of Health staff. Then we got the informed consent for administering praziquantel in  
173 writing from the participants. In the case of those participants who were under 20 years of age, we also  
174 obtained confirmation from their guardians. Concurrently, we checked, in advance, the drug allergy  
175 history of all the participants and no one had a praziquantel allergy. Regarding the safety of praziquantel  
176 administration, we consider those under the age of 4 years as an ineligible population. Women within  
177 their first trimester of pregnancy and those who had a history of epilepsy or other signs of potential  
178 neurological disease were also excluded from mass drug administration. Praziquantel 40mg/kg was  
179 administered to eligible participants (838 people in 2010 and 1,027 in 2011, 728 in 2013), who agreed by  
180 Directory Observed Treatment, Short Course (DOTS) protocol by using weight scales. After praziquantel  
181 administration by DOTS, we confirmed whether there were no adverse reactions to each participant for at  
182 least 30 minutes under the supervision of physicians. In addition, the Malawi Ministry of Health staff  
183 lectured on prevention of schistosomiasis to all participants using printed materials written in Chichewa.

184

### 185 **Ethical consideration**

186 Clearance to undertake the follow up study was obtained from the District Health Office of the Ministry  
187 of Health (MOH) in Malawi and Kansai Medical University Ethical Committee in Japan. In the areas  
188 used in the study, permission to proceed with the study was obtained from the District Health Officer  
189 (DHO). The approved number of Ethics Review Committee (KAN-I-RIN) is 0758.

190 A signed consent form was obtained from both the new and old participants in the study. The consent

191 form contained the following information: general introduction of the study, usefulness of the study, and  
192 purpose of the study. The participants were allowed to withdraw at any point during the project whenever  
193 they deemed appropriate.

194

## 195 **Data analysis**

196 The quantitative data were analysed using SPSS (version 20.0.0). First, SPSS was used for  
197 cross tabulation and running of frequencies. Secondly, the chi-square test was used to  
198 establish the relationship between the categorical variables. A p value less than 0.05 was  
199 considered statistically significant. Graphs were drawn using Apple Inc. Numbers  
200 (Ver.4.3.1).

201

## 202 **Results**

203 Table 1 shows the summary of urine filtering examination. The study focused on a random sample of  
204 people who participated in our survey: 242 people (age:  $22.69 \pm 35.56$  years) in June 2010; 260 people  
205 (age:  $22.81 \pm 35.47$  years) in August 2010; 315 people (age:  $23.55 \pm 38.00$  years) in June 2011; and 350  
206 people (age:  $23.56 \pm 37.57$  years) in August 2011. Research showed the egg positive prevalence for males  
207 was 42.6% (95%CI: 33.6-52.1) and for female participants was 27.6% (95%CI: 20.7-35.8). Fig 1 shows  
208 the egg positive prevalence among all participants in 2010-2011. The schistosome-egg positive  
209 prevalence among the participants was 34.3% (95%CI: 28.5-40.5) just before mass drug administration  
210 (MDA); and this result was almost the same as the egg positive prevalence in Malawi that was previously  
211 reported. By age group, the highest egg positive prevalence was detected in participants in their 20s and it  
212 was 47.5% (95%CI: 32.8-62.6) before the first MDA, among this group the egg positive prevalence of  
213 males in their 20s was 53.3% (95%CI: 29.9-75.4). The first MDA was conducted for 838 participants  
214 (46.3%) just after the urine examinations. No one who took praziquantel showed any obvious side effects.  
215 The schistosome egg positive prevalence 8 weeks after MDA was 12.7% (95%CI: 9.2-17.3), and it was  
216 significantly lower than that before the mass treatment in June ( $p < 0.01$ ). Egg positive prevalence  
217 decreased in all age groups. One year after the first MDA, egg positive prevalence was 14.6% (95%CI:  
218 11.1-19.0) in June 2011 and MDA supposedly kept the prevalence low. However, the prevalence  
219 increased in the under-15 age group shown in Figs 2-a and b, those are the process of egg positive  
220 prevalence by age groups in 2010-2011. Among those in the under-15 age group, the gradient of the  
221 increasing line of the under-5 group was steepest. The egg positive prevalence of those in the under-5 age  
222 group increased from 0% to 26.7% ten months after checking urinalysis in August 2010. On the other  
223 hand, the egg positive prevalence for participants between 15 and 19 years remained the same and the  
224 prevalence of those in the older than 20 age group decreased. The second MDA for 1,027 participants  
225 (56.7%) was conducted just after the urine examination in June 2011, and 8 weeks later the egg positive  
226 prevalence was 6.9% (95%CI: 4.6-10.0). The egg positive prevalence significantly decreased after the  
227 second MDA ( $p < 0.01$ ) in August 2011 and the total reduction rate completed sequential MDA was 79.9%.  
228 The egg positive prevalence was significantly reduced among those in the age groups of 10-14 year-olds

229 and 15-19 year-olds ( $p < 0.05$ ). After the second MDA, none of the people who took praziquantel had  
 230 obvious side effects.

231

232 **Table 1 Results of urine filtering examination 2010-2011**

|           |       | 2010               |                     |                                 |                    |                     |                                 | 2011              |                    |                     |                                 |                    |                     |                                 |                 |             |
|-----------|-------|--------------------|---------------------|---------------------------------|--------------------|---------------------|---------------------------------|-------------------|--------------------|---------------------|---------------------------------|--------------------|---------------------|---------------------------------|-----------------|-------------|
|           |       | June               |                     |                                 | August             |                     |                                 | June              |                    |                     | August                          |                    |                     |                                 |                 |             |
|           |       | Number of Subjects | Egg positive number | Egg positive prevalence (95%CI) | Number of Subjects | Egg positive number | Egg positive prevalence (95%CI) | P value           | Number of Subjects | Egg positive number | Egg positive prevalence (95%CI) | Number of Subjects | Egg positive number | Egg positive prevalence (95%CI) | P value         |             |
| Total     |       | 242                | 83                  | 34.3 (28.5-40.5)                | 260                | 33                  | 12.7** (9.2-17.3)               | $P < 0.01$        | 315                | 46                  | 14.6 (11.1-19.0)                | 350                | 24                  | 6.9** (4.6-10.0)                | $P < 0.01$      |             |
| Male      |       | 108                | 46                  | 42.6 (33.6-52.1)                | 123                | 16                  | 13.0** (8.1-20.2)               | $P < 0.01$        | 152                | 25                  | 16.4 (11.4-23.2)                | 172                | 9                   | 5.2** (2.8-9.7)                 | $P < 0.01$      |             |
| Female    |       | 134                | 37                  | 27.6 (20.7-35.8)                | 137                | 17                  | 12.4 (8.3-20.0)                 | $P < 0.01$        | 163                | 21                  | 12.9 (8.5-19.0)                 | 178                | 15                  | 8.4 (5.1-13.5)                  | $P = 0.181$     |             |
| Age group | ~4    | Male               | 5                   | 3                               | 60.0 (22.8-88.4)   | 6                   | 0                               | 0.0* (0.0-39.5)   | $P < 0.05$         | 11                  | 3                               | 27.3 (9.6-56.8)    | 12                  | 1                               | 8.3 (1.5-35.7)  | $P = 0.231$ |
|           |       | Female             | 4                   | 0                               | 0.0 (0.0-49.5)     | 4                   | 0                               | 0.0 (0.0-49.5)    | -                  | 4                   | 1                               | 25.0 (4.5-70.3)    | 6                   | 1                               | 16.7 (3.0-58.7) | $P = 0.322$ |
|           |       | Total              | 9                   | 3                               | 33.3 (11.9-64.8)   | 10                  | 0                               | 0.0* (0.0-28.2)   | $P < 0.05$         | 15                  | 4                               | 26.7 (10.8-52.2)   | 18                  | 2                               | 11.1 (3.1-33.1) | $P = 0.249$ |
|           | 5~9   | Male               | 25                  | 8                               | 32.1 (17.1-51.8)   | 26                  | 0                               | 0.0 (0.0-13.1)    | $P < 0.01$         | 31                  | 5                               | 16.1 (7.0-32.8)    | 32                  | 2                               | 6.3 (1.7-20.3)  | $P = 0.212$ |
|           |       | Female             | 29                  | 10                              | 34.5 (19.8-52.8)   | 30                  | 2                               | 6.7** (1.7-20.3)  | $P < 0.01$         | 29                  | 6                               | 20.7 (9.8-38.6)    | 27                  | 5                               | 18.5 (8.1-36.6) | $P = 0.838$ |
|           |       | Total              | 54                  | 18                              | 33.4 (22.1-46.8)   | 56                  | 2                               | 3.6** (1.0-12.2)  | $P < 0.01$         | 60                  | 11                              | 18.3 (10.5-30.1)   | 59                  | 7                               | 11.9 (5.8-22.7) | $P = 0.325$ |
|           | 10~14 | Male               | 22                  | 11                              | 50 (30.6-69.4)     | 24                  | 3                               | 12.5** (4.3-31.2) | $P < 0.01$         | 24                  | 8                               | 33.3 (17.9-63.5)   | 21                  | 3                               | 14.3 (4.9-34.9) | $P = 0.138$ |
|           |       | Female             | 26                  | 7                               | 26.9 (13.6-46.3)   | 26                  | 5                               | 19.2 (8.4-38.1)   | $P = 0.510$        | 28                  | 7                               | 25.0 (12.6-43.6)   | 32                  | 2                               | 6.3* (1.7-20.3) | $P < 0.05$  |
|           |       | Total              | 48                  | 18                              | 37.5 (25.1-51.8)   | 50                  | 8                               | 16.0* (8.3-28.7)  | $P < 0.05$         | 52                  | 15                              | 28.8 (18.2-42.4)   | 53                  | 5                               | 9.4* (4.1-20.4) | $P < 0.05$  |
|           | 15~19 | Male               | 11                  | 5                               | 45.5 (21.1-72.2)   | 14                  | 3                               | 21.4 (7.5-47.9)   | $P = 0.201$        | 14                  | 2                               | 14.3 (4.0-40.2)    | 17                  | 0                               | 0.0 (0.0-18.7)  | $P = 0.107$ |
|           |       | Female             | 10                  | 3                               | 30.0 (10.7-60.6)   | 14                  | 3                               | 21.4 (7.5-47.9)   | $P = 0.632$        | 14                  | 4                               | 28.6 (11.6-54.9)   | 14                  | 1                               | 7.1 (1.3-31.8)  | $P = 0.139$ |
|           |       | Total              | 21                  | 8                               | 38.1 (20.6-59.3)   | 28                  | 6                               | 21.4 (10.1-39.7)  | $P = 0.201$        | 28                  | 6                               | 21.4 (10.1-39.7)   | 31                  | 1                               | 3.2* (0.6-16.4) | $P < 0.05$  |
|           | 20~29 | Male               | 15                  | 8                               | 53.3 (29.9-75.4)   | 19                  | 4                               | 21.1 (8.4-43.6)   | $P = 0.051$        | 21                  | 2                               | 9.5 (2.6-29.2)     | 23                  | 2                               | 8.7 (2.4-27.0)  | $P = 0.924$ |
|           |       | Female             | 25                  | 11                              | 44.0 (26.5-63.1)   | 27                  | 3                               | 11.1** (3.8-28.3) | $P < 0.01$         | 30                  | 1                               | 3.3 (0.6-16.9)     | 29                  | 2                               | 6.9 (1.9-22.2)  | $P = 0.533$ |
|           |       | Total              | 40                  | 19                              | 47.5 (32.8-62.6)   | 46                  | 7                               | 15.2 (7.5-28.4)   | $P < 0.01$         | 51                  | 3                               | 5.9 (2.0-16.1)     | 52                  | 4                               | 7.7 (3.0-18.3)  | $P = 0.715$ |
|           | 30~39 | Male               | 14                  | 5                               | 35.7 (16.2-61.5)   | 16                  | 4                               | 25.0 (10.1-49.7)  | $P = 0.523$        | 16                  | 2                               | 12.5 (3.5-36.3)    | 18                  | 1                               | 5.6 (1.0-26.0)  | $P = 0.476$ |
|           |       | Female             | 15                  | 5                               | 33.3 (15.1-58.5)   | 18                  | 1                               | 5.6* (1.0-26.0)   | $P < 0.05$         | 18                  | 1                               | 5.6 (1.0-26.0)     | 18                  | 2                               | 11.1 (3.1-33.1) | $P = 0.546$ |
|           |       | Total              | 29                  | 10                              | 34.5 (19.8-52.8)   | 34                  | 5                               | 14.7 (6.4-30.3)   | $P = 0.066$        | 34                  | 3                               | 8.8 (3.0-23.1)     | 36                  | 3                               | 8.3 (2.8-22.0)  | $P = 0.942$ |
|           | 40~   | Male               | 16                  | 6                               | 37.5 (18.3-61.6)   | 18                  | 2                               | 11.1 (3.1-33.1)   | $P = 0.070$        | 24                  | 3                               | 12.5 (4.3-31.2)    | 25                  | 0                               | 0.0 (0.0-13.6)  | $P = 0.068$ |
|           |       | Female             | 25                  | 1                               | 4.0 (0.7-19.8)     | 18                  | 3                               | 16.7 (5.8-39.5)   | $P = 0.158$        | 29                  | 1                               | 3.4 (0.6-17.4)     | 27                  | 2                               | 7.4 (2.0-23.6)  | $P = 0.511$ |
|           |       | Total              | 41                  | 7                               | 17.1 (8.5-31.4)    | 36                  | 5                               | 13.9 (6.0-28.8)   | $P = 0.701$        | 53                  | 4                               | 7.5 (2.9-18.0)     | 52                  | 2                               | 3.8 (1.0-13.1)  | $P = 0.414$ |

(\* $p < 0.05$ , \*\* $p < 0.01$ )

233

234

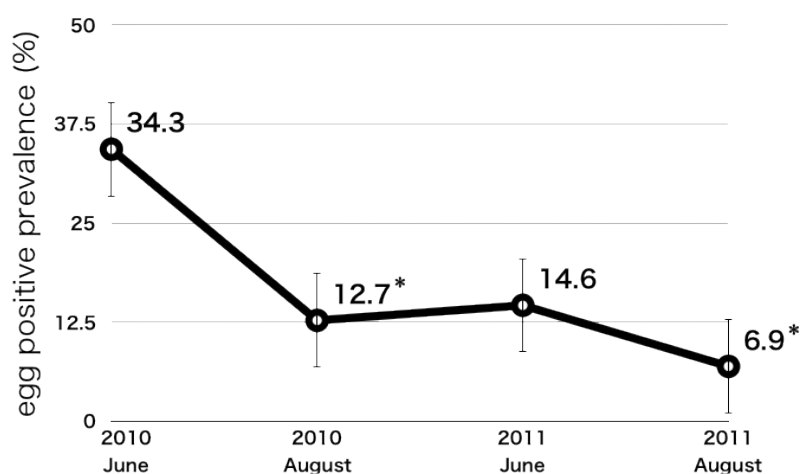

235

(\*:  $p < 0.01$ ,  $\chi^2$  test)

236 **Fig 1 Process of egg positive prevalence among all participants 2010-2011**

237

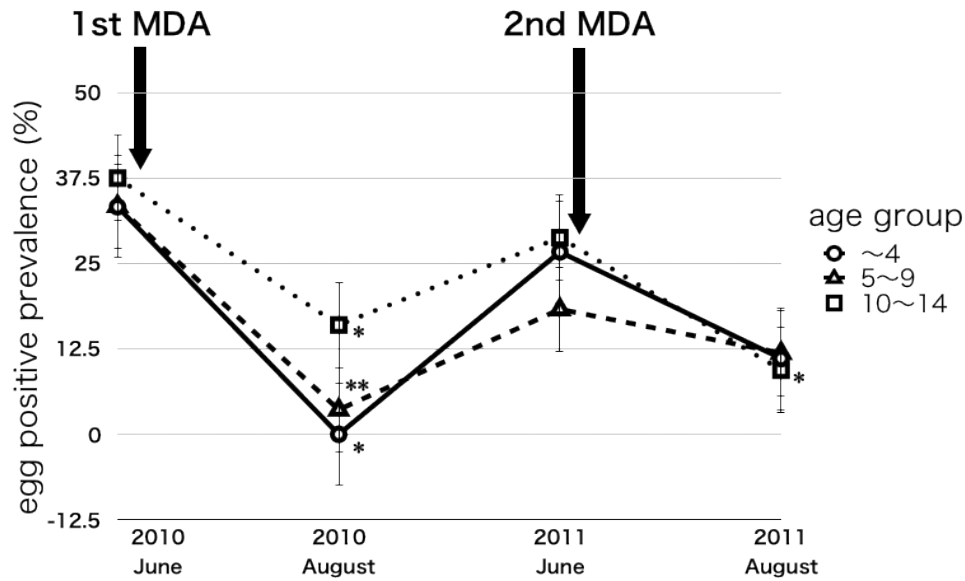

( \*:p<0.05, \*\*: p<0.01,  $\chi^2$  test )

238

239 **Fig 2-a Process of egg positive prevalence by age group 2010-2011**

240

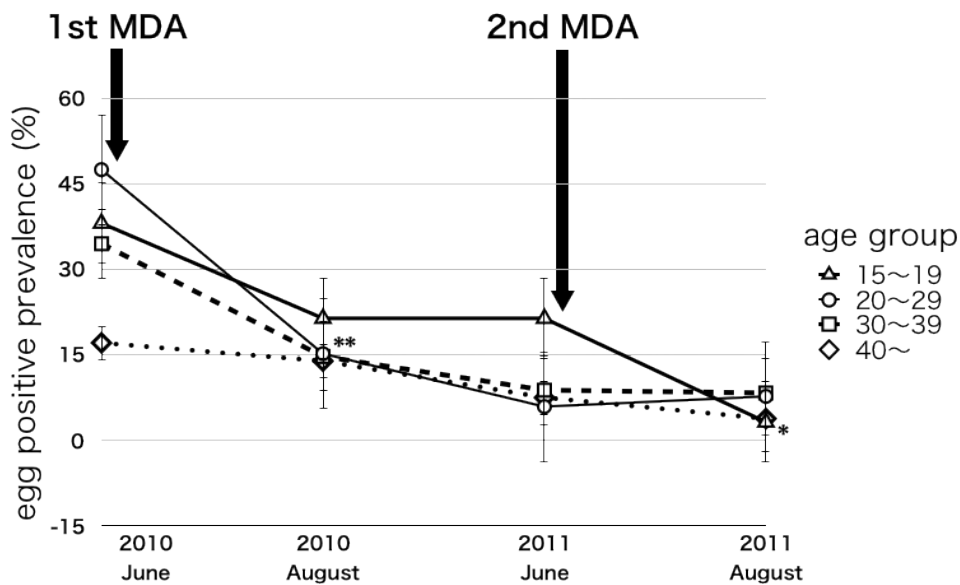

( \*: p<0.01, \*\*: p<0.05,  $\chi^2$  test )

241

242 **Fig 2-b Process of egg positive prevalence by age group 2010-2011**

243

244 Fig 3 shows analysis for the results of occult blood by the urine reagent strips in 2010-2011. After  
245 MDA, the positive predictive value decreased but the negative predictive value remained high, more than  
246 96%. After the second MDA, the negative predictive value was 99.2% (95%CI: 98.1-100). The sensitivity  
247 was 91.7% (95%CI: 80.6-100) and the specificity was 87.7% (95%CI: 83.9-91.6).

248



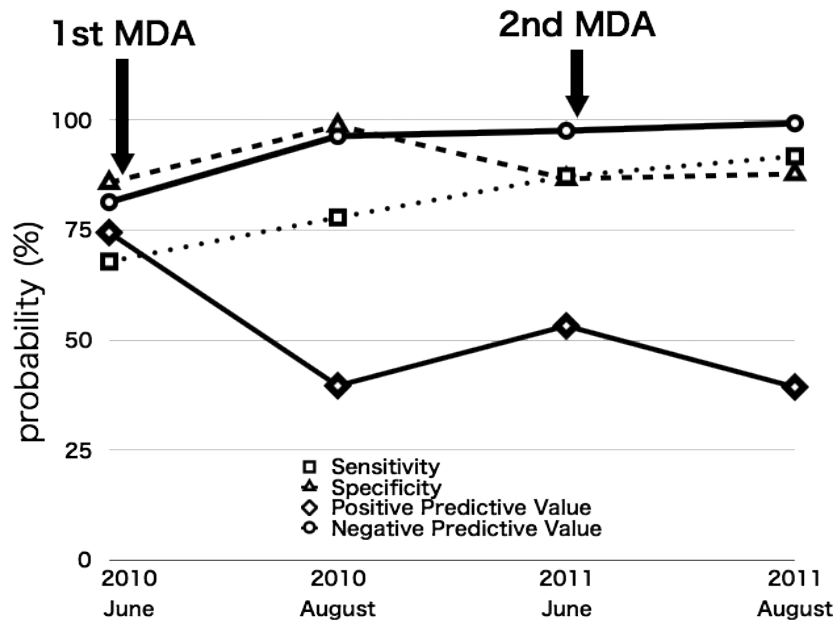

249

### 250 Fig 3 Analysis for the results of occult blood by urine strip tests

251

252 The surveyed areas in 2013 were the same areas where the MDA of praziquantel was previously  
 253 conducted in 2012. Table 2 shows that overall MDA coverage rate in 2012 had ranged from 50.25% to  
 254 85.8%. Table 3 shows the result for the urine filtering examination in 2013. Total participants were 264  
 255 people (age:  $21.78 \pm 38.42$  years) in June and 211 (age:  $19.99 \pm 36.66$  years) in August; and they were  
 256 selected by random sampling among all the residents. The egg positive prevalence in 264 participants was  
 257 3.8% (95%CI: 2.1-6.9), it was relatively lower than the average prevalence of the country and the highest  
 258 was 8.8% (95%CI: 3.0-23.1) in those under five (Table 3). Eight weeks after MDA, egg positive  
 259 prevalence decreased to 0.9% (95%CI: 0.3-3.4,  $p=0.050$ ). The reduction rate was 76.3%. Schistosome  
 260 eggs were not detected at all in most age groups, excluding the 15-19 age group. Those in the 15-19 age  
 261 group had an egg positive prevalence was 11.1% (95%CI: 3.3-33.1) 8 weeks after MDA shown in Figs 4a  
 262 and b, those are the process of egg positive prevalence by age groups in 2013. The youngest subject  
 263 among the egg positive group was a 2-year-old boy. Praziquantel 40mg/kg was administered to 728  
 264 participants (52.3%) more than 4-years-old by DOTS immediately after urine examination. We confirmed  
 265 that no one experienced any side effects from the praziquantel administration.

266

267 **Table 2 MDA Coverage Rate by Area in 2012**

| Socio-demographic characteristics Area | Proportional MDA Attendance by Area 2012 |         |                         |
|----------------------------------------|------------------------------------------|---------|-------------------------|
|                                        | Registered                               | Treated | Percentage Coverage (%) |
| Chisindo                               | 390                                      | 196     | 50.3                    |
| Mtika                                  | 331                                      | 284     | 85.8                    |
| Mapiri                                 | 296                                      | 192     | 64.9                    |
| Chisaka                                | 376                                      | 200     | 53.2                    |
| Total                                  | 1,393                                    | 772     | 55.4                    |

268

269

270 **Table 3 Results of urine filtering examination 2013**

|                     |                                 |                     | 2013               |                                 |                 |                    |                    |                 | P value |
|---------------------|---------------------------------|---------------------|--------------------|---------------------------------|-----------------|--------------------|--------------------|-----------------|---------|
|                     |                                 |                     | June               |                                 |                 | August             |                    |                 |         |
|                     |                                 |                     | Number of Subjects | Before MDA*                     |                 | Number of Subjects | 8 weeks after MDA* |                 |         |
| Egg positive number | Egg positive prevalence (95%CI) | Egg positive number |                    | Egg positive prevalence (95%CI) |                 |                    |                    |                 |         |
| Total               |                                 |                     | 264                | 10                              | 3.8 (2.1-6.9)   | 211                | 2                  | 0.9 (0.3-3.4)   | P=0.050 |
| Male                |                                 |                     | 99                 | 6                               | 6.1 (2.8-12.7)  | 86                 | 1                  | 1.2 (0.2-6.4)   | P=0.082 |
| Female              |                                 |                     | 165                | 4                               | 2.4 (0.9-6.1)   | 125                | 1                  | 0.8 (0.1-4.5)   | P=0.293 |
| Age group           | ~4                              | Male                | 14                 | 1                               | 7.1 (1.3-31.8)  | 8                  | 0                  | 0.0 (0.0-32.9)  | P=0.439 |
|                     |                                 | Female              | 20                 | 2                               | 10.0 (2.8-30.4) | 15                 | 0                  | 0.0 (0.0-20.7)  | P=0.207 |
|                     |                                 | Total               | 34                 | 3                               | 8.8 (3.0-23.1)  | 23                 | 0                  | 0.0 (0.0-14.6)  | P=0.143 |
|                     | 5~9                             | Male                | 20                 | 1                               | 5.0 (0.9-23.9)  | 22                 | 0                  | 0.0 (0.0-15.1)  | P=0.288 |
|                     |                                 | Female              | 19                 | 0                               | 0.0 (0.0-17.1)  | 19                 | 0                  | 0.0 (0.0-17.1)  | -       |
|                     |                                 | Total               | 39                 | 1                               | 2.6 (0.4-13.3)  | 41                 | 0                  | 0.0 (0.0-8.7)   | P=0.302 |
|                     | 10~14                           | Male                | 28                 | 1                               | 3.6 (0.6-17.9)  | 22                 | 0                  | 0.0 (0.0-15.1)  | P=0.371 |
|                     |                                 | Female              | 26                 | 1                               | 3.8 (0.7-19.1)  | 33                 | 0                  | 0.0 (0.0-10.6)  | P=0.256 |
|                     |                                 | Total               | 54                 | 2                               | 3.7 (1.0-12.7)  | 55                 | 0                  | 0.0 (0.0-6.7)   | P=0.150 |
|                     | 15~19                           | Male                | 9                  | 1                               | 11.1 (2.0-43.9) | 8                  | 1                  | 12.5 (2.2-47.5) | P=0.929 |
|                     |                                 | Female              | 22                 | 0                               | 0.0 (0.0-15.1)  | 10                 | 1                  | 10.0 (1.8-40.8) | P=0.132 |
|                     |                                 | Total               | 31                 | 1                               | 3.2 (0.6-16.4)  | 18                 | 2                  | 11.1 (3.1-33.1) | P=0.267 |
|                     | 20~29                           | Male                | 13                 | 1                               | 7.7 (1.4-33.6)  | 15                 | 0                  | 0.0 (0.0-20.7)  | P=0.274 |
|                     |                                 | Female              | 32                 | 1                               | 3.1 (0.5-15.9)  | 20                 | 0                  | 0.0 (0.0-16.4)  | P=0.425 |
|                     |                                 | Total               | 45                 | 2                               | 4.4 (1.2-15.0)  | 35                 | 0                  | 0.0 (0.0-10.1)  | P=0.207 |
|                     | 30~39                           | Male                | 3                  | 1                               | 33.3 (6.1-79.5) | 2                  | 0                  | 0.0 (0.0-66.2)  | P=0.361 |
|                     |                                 | Female              | 12                 | 0                               | 0.0 (0.0-24.6)  | 5                  | 0                  | 0.0 (0.0-43.9)  | -       |
|                     |                                 | Total               | 15                 | 1                               | 6.7 (1.2-30.1)  | 7                  | 0                  | 0.0 (0.0-35.9)  | P=0.484 |
|                     | 40~                             | Male                | 12                 | 0                               | 0.0 (0.0-24.6)  | 9                  | 0                  | 0.0 (0.0-30.3)  | -       |
|                     |                                 | Female              | 34                 | 2                               | 5.9 (1.6-19.3)  | 23                 | 0                  | 0.0 (0.0-14.6)  | P=0.236 |
|                     |                                 | Total               | 46                 | 2                               | 4.3 (1.2-14.7)  | 32                 | 0                  | 0.0 (0.0-10.9)  | P=0.232 |

271

272

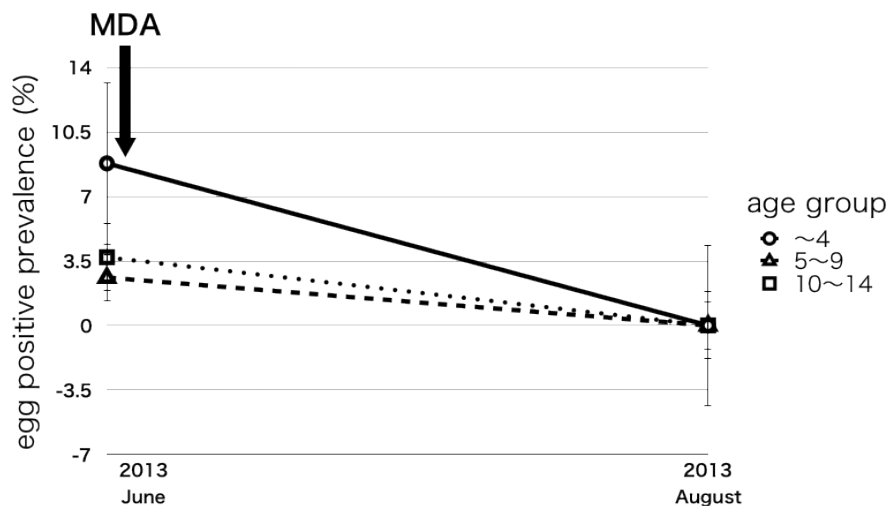

273

274 **Fig 4-a Process of egg positive prevalence by age group 2013**

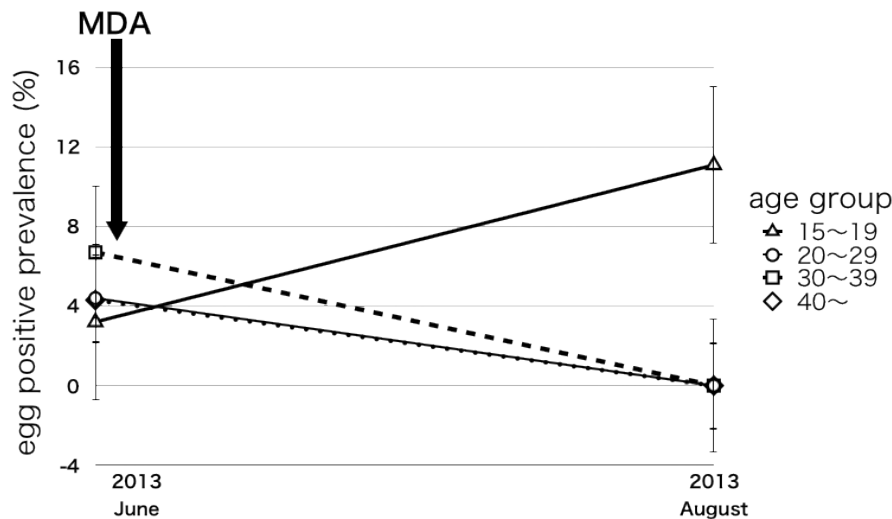

275

276 **Fig 4-b Process of egg positive prevalence by Age group 2013**

277

278 The cost of one urine reagent strip and one tablet of praziquantel were US\$0.06 and US\$0.125 in 2013  
279 in Malawi. After MDA in reducing the egg positive prevalence, the positive predictive value was  
280 decreased and the negative predictive value was more than 96%. This suggests that it is practical to  
281 exclude urine occult blood negative subjects from receiving praziquantel.

282

## 283 Discussion

284 Agriculture is one of main source of employment for people in developing countries such as Malawi. In  
285 fact, agriculture produces employment for more than 80% of the active labour force in Malawi [7]. The  
286 International Labour Organization (ILO) states that agricultural work is one of the most hazardous  
287 occupational activities to health worldwide [14]. Many kinds of agricultural activities are related to  
288 occupational injuries and those who are engaged in agriculture are being exposed to the risk of  
289 schistosome infection because they come into contact with freshwater during farm work in schistosome  
290 endemic countries. Although schistosomiasis is not specifically documented in the list of ILO  
291 occupational diseases [15], but it should be related to the occupational risks. Schistosomiasis is associated  
292 with populations living in poverty in sub-Saharan Africa, including Malawi. In order to ameliorate  
293 poverty, it is key to improve the working environment and maintain sustainable economic growth. It is  
294 because that good health significantly promotes economic growth, both in the short-run and long-run  
295 [16]. The labour force age ranges from 15- to 64-years of age, and 15- to 29-year olds are presumed to be  
296 the main labour force generation, accounting for 51.6% among all labour force generation [17].  
297 Schistosomiasis could be presumed to have concerning with occupational risks in sub-Saharan African  
298 countries where agriculture is the main industry. If schistosomiasis has occupation-related risks, then  
299 adequate healthcare service should be provided for the labour force in order to provide a stable GDP  
300 growth rate. Improving health conditions boosts the productivity of workers and that increases economic  
301 growth in the long-run [16]. Thus, it is expected that protecting the health of the labour force could lead to  
302 a reduction in poverty in tropical and subtropical countries and mobilize national development in the

303 region.

304 Schistosomiasis is prevalent throughout Malawi. Since the late 1990s, the decline in human capital  
305 accelerated the collapse of public health services [18]. The country depends on the income generated  
306 from agriculture. More than half of the Malawi population is food insecure [19] and 65.3% of the people  
307 are unable to meet their daily dietary needs [20]. According to previous studies [7-10, 21-24],  
308 school-aged children are a high-risk group for schistosomiasis infection. Our study showed that before the  
309 first MDA in June 2010, those in the twenties showed the highest egg positive prevalence (Table 1).  
310 Those in the twenties belonged to the labour force. To alleviate poverty, and cases of schistosomiasis  
311 related to poverty, it is important for the economic growth and development of this country to protect the  
312 health of the labour force. In the older-than-20 age group, the egg positive prevalence decreased ten  
313 months after the first MDA (Fig 2-b). In general, providing health information about schistosomiasis may  
314 bring about behavioral changes in the population that would improve the overall health in the country.

315 An increase in the egg positive prevalence was observed in the under-15-age group one year after  
316 MDA in June 2011. Among under-15-age group, the gradient of the increasing line of under-5 age-group  
317 was steepest (Fig 2a). Positive egg prevalence of each age group in 2013 was lower than the average in  
318 Malawi, and the highest was 8.8% in the under-5-age group (Table 3). There is a high risk of infection for  
319 those under the age of 15 years, and it is suggested that this tendency may be greater among those under  
320 the age of 5 years. Previous studies reported that pre-school children are also at the risk of schistosome  
321 infection [25], and when school-aged children were screened schistosome infection ranged from 5% to  
322 57% [26]. In order to confirm the minimum age of schistosome infection, all subjects, of all ages, in the  
323 study underwent a urine examination in 2013. We detected that the age of the youngest infected subject  
324 was 2-years-old in this study. Pre-school children frequently accompany their guardians into the  
325 freshwater areas [27]. Although it is known that pre-school children also face schistosome infection [28],  
326 there is still room for further study on the safety of administering praziquantel to children less than 4  
327 years of age. MDA, however, may be a more promising approach to disease control in Malawi [29]. The  
328 Malawi National Schistosomiasis Control Programme does not have well-documented evidence of the  
329 universal drug treatment [30]. As the first step in breaking the chain of chronic and repetitive infection,  
330 the first year of school enrollment is considered an appropriate time for the first MDA after birth.

331 In only 15-19 age group, elevation of the egg positive prevalence was confirmed after MDA in August  
332 2013 (Fig 4b). Therefore, those who graduated from schools –who are in the 15-19 age group- belong to  
333 the high-risk group for repeat schistosome repeated.

334 Referring to the population pyramid of Malawi in 2010, teens, twenties, and school-aged children  
335 accounted for about 60% of the total population [31]. The population of teens and twenties is more than  
336 four million. These two generational groups are presumed to be major labour force; so if their health  
337 suffers due to schistosome infection, it may have undesirable effects on national development and  
338 economic growth. As previously mentioned, agriculture is the primary industry and provides more than  
339 80% of employment in the country [7]. Moreover, community-wide MDA of praziquantel is highly cost  
340 effective when compared with treatment of school-aged children alone [32]. Therefore, it is important to

341 protect the health of not only school-aged children, but also the overall labour force. There seems to be a  
342 link between health and income growth in the schistosomiasis endemic areas. The main route of  
343 schistosome infection is through contact with infected freshwater. The daily activities of Malawians result  
344 in contact with freshwater through fishing, farming, washing, bathing, swimming, and so on. The  
345 occupations which are at risk of infection with schistosomiasis in Malawi are; rice farmers, sugarcane  
346 growers, irrigators thus those responsible for opening water flow in canals, fishermen, tobacco growers,  
347 vegetable farmers, cattle wrestlers, held man, cane cutters, fish pond workers, and wildlife guards [9]. For  
348 instance in Japan, a former schistosomiasis endemic country (*Schistosoma japonicum*), schistosomiasis  
349 was regarded as an occupational disease for rice farmers [33]. And farmers' health injuries caused by  
350 schistosomiasis were symbolically elaborated in Katayama Memoir (Katayama-ki) written by Dr  
351 Yoshinao Fujii in 1847. Human excrement, often containing schistosome eggs, is spread in fertilizing the  
352 fields, and the barelegged farmers in rice-paddies are easy victims for cercariae. Generally, urination and  
353 defecation are the main methods for schistosome eggs to get into the environment. The transmission of  
354 schistosomiasis in Malawi remains fragmented [34], and setting up proper toilets and designating specific  
355 places for latrines/toilets in each district is thought to be an effective method of infection control. From  
356 2010 to 2011 survey, the egg positive prevalence after MDA decreased, but it was not eradicated. On the  
357 other hand, in the survey of 2013, egg positive prevalence was reduced to 0% in all age groups except in  
358 the 15-19 age group (Figs 4-a and b). The surveyed areas in 2013 are located near the Capital City  
359 Lilongwe, where health education and promotion about schistosomiasis infection was conducted at  
360 schools and there were frequent media broadcasts on the subject. These activities may have led to  
361 differences in the survey results. Workers in rural areas are more likely to earn less than their counterparts  
362 in urban areas [15]. The difference in income may also have a bearing on schistosome infection. In  
363 Nkhotakota district on Lake Malawi, it is assumed that many residents are in contact with fresh water area  
364 more frequently because agricultural activities are greater than in the environs of Lilongwe.

365 Haematobium schistosomiasis can cause and aggravate anemia caused by low dietary iron, hookworm  
366 infection, and malaria in Malawi. The health hazards related to haematobium schistosomiasis can include  
367 bladder cancer and cervical cancer, but most likely there are repeated infections and chronic infections  
368 occurring with these severe diseases. Although bladder cancer occurs principally as urothelial carcinoma,  
369 the major histological cell type of bladder cancer associated to haematobium schistosomiasis is squamous  
370 cell carcinoma [35-37]. Because the occurrence of squamous cell carcinoma is associated with persistent  
371 chronic inflammation, it is essential to prevent chronic infections and repetitive infections to suppress its  
372 development.

373 MDA of praziquantel was conducted in June 2010, and the egg positive prevalence one year later  
374 decreased to about two fifth as shown in Fig 1 ( $p < 0.01$ ). Egg positive prevalence in the target areas in  
375 2013 where MDA was conducted in 2012 was 3.8%; and it was supposed to be lower than previously  
376 reported egg positive prevalence in Malawi. These results showed that MDA of praziquantel could  
377 certainly reduce egg positive prevalence of haematobium schistosomiasis. Although MDA is not an  
378 effective replacement for the existing vector control, MDA has the potential to reduce transmission for a

379 limited time and has to be repeated regularly for sustained effect [38]. However, the egg positive  
380 prevalence in August 2013 was reduced from 3.8% to 0.9% two months after MDA ( $p=0.050$ ). This result  
381 indicates that the effectiveness of annual MDA might reduce over time. Thus, it may not be necessary to  
382 carry out MDA every year. After mass drug administration of praziquantel, no resident showed serious  
383 adverse reactions and is also considered safe and appropriate.

384 Former studies indicated the cost-effectiveness of urine reagent strips [39, 40], but it is still uncertain  
385 whether the urine reagent strip is cost-effective [41, 42]. We analyzed the effectiveness of the urine  
386 reagent strips for checking hematuria [43]. The cost of one reagent strip and one tablet of praziquantel  
387 was US\$0.06 and US\$0.125 in 2013 in Malawi. After MDA in reducing the egg positive prevalence, the  
388 positive predictive value was decreased and the negative predictive value was more than 96%. This  
389 suggests that it is practical to exclude urine occult blood negative subjects from receiving praziquantel;  
390 and then this screening for MDA could lead to cost-effectiveness for schistosomiasis control. Since the  
391 urine reagent strips can also produce false negatives, continuation of MDA is important for achieving  
392 better infection control.

393 Assuming 1,810 subjects for MDA of praziquantel and presupposing the average body weight of the  
394 subject to be 40kg, three tablets of praziquantel are needed to for each subject. Under this assumption, if  
395 praziquantel is administered to all 1,810 subjects, the total cost will be US\$678.80, US\$0.38 per person.  
396 However, assuming an egg positive prevalence of 40% and screening using urine reagent strips and  
397 administering praziquantel, the total cost can be estimated to be US\$515.90, US\$0.29 per person. If the  
398 egg positive prevalence is 40%, screening subjects for MDA using urine reagent strips, the cost reduction  
399 can be estimated to be about 24% -showing an overall cost reduction. It should be noted that in a  
400 very-low egg positive prevalence settings, microhaematuria is an unstable manifestation for haematobium  
401 schistosomiasis and the treatment decision should not be based on the urine reagent strips results alone  
402 [44]; different kinds of examinations for differential diagnoses should be performed according to each  
403 disease condition. Despite the reported high rate of infection noted in the previous study, the tendency to  
404 seek medication from a medical facility is not substantial, with only 34.7% of the respondents seeking  
405 treatment for haematuria at the nearest medical facility [45]. If someone has symptoms but leaves the  
406 facility, the chain of chronic/repetitive schistosome infection can not be broken. Therefore, when  
407 symptoms such as hematuria are presented, it is important to thoroughly inform every resident that he/she  
408 should consult a medical institution promptly without neglecting it. Sustainable health education for  
409 children and young adults is the pillar for controlling schistosome infection and it could lead to better  
410 health management.

411 Schistosomiasis, without proper intervention and treatment, belongs to a group of diseases that could  
412 lead to morbidity and mortality to the residents in schistosome endemic countries. And yet,  
413 schistosomiasis does not draw as much attention as malaria and tuberculosis, it is still one of the  
414 neglected tropical diseases (NTDs). Not enough countermeasures are taken to control the disease; and it  
415 could choke off economic development and growth in low-income tropical countries such as Malawi.  
416 Although it is expected that urgent schistosomiasis countermeasures will make a great social contribution

417 in affected tropical countries, it can be easily imagined that the budgeting for countermeasures will be  
418 quite difficult in those countries. Thus, it is considered essential to prioritize to the implementation of  
419 countermeasures. School-aged children were the main targets for schistosomiasis countermeasure in the  
420 past, but this research shows that both the infection rate and the recurrence rate were higher in the labour  
421 force and that may have a direct influence on economic development. Agricultural work is the main form  
422 of labour in many developing countries, including Malawi, and contact with freshwater areas is inevitable  
423 as long as the residents are engaged in agricultural activities. Therefore, schistosomiasis should be  
424 considered to have concerning with occupational risks. Good health is positively related to economic  
425 growth or output [16]. Based on the results of this study, we believe that reasonable countermeasures and  
426 well-targeted treatment could reduce the prevalence of haematobium schistosomiasis; and this could lead  
427 to an improvement in morbidity and mortality, reducing the prevalence of schistosomiasis in Malawi and  
428 other schistosome endemic countries. It will be resulted to protect health of labour force, too.  
429 Furthermore, since schistosomiasis is presumed to have occupation-related risks, we consider that  
430 schistosome control will be a valuable step-up to economic development and make a social contribution  
431 in Malawi and many low-income tropical countries.

432

### 433 **Acknowledgement**

434 This research was supported by JSPS KAKENHI Grant Number JP23406025. And Ms. Yuko Harada  
435 (Nippon International Cooperation for Community Development, Japan: NICCO) provided eager support  
436 and made a great contribution to our research.

437

### 438 **References**

- 439 1. de Silva NR, Brooker S, Hotez PJ, et al. Soil-transmitted helminth infections: updating the global  
440 picture. *Trends Parasitol* 2003; 19(12): 547-51.
- 441 2. Review of Human Carcinogens, IARC Monographs, Volume 100, 2012, International Agency for  
442 Research on Cancer, World Health Organization.
- 443 3. Mostafa MH, Sheweita SA, O'connor PJ. Relationship between Schistosomiasis and Bladder Cancer.  
444 *Clinical Microbiology Reviews* Jan 1999; Vol. 12, No. 1: 97-111.
- 445 4. Daniel G Colley, Amaya L Bustinduy, W Evan Secor, Charles H King. Human schistosomiasis. *Lancet*  
446 2014; 383: 2253-2264.
- 447 5. Deribew A, Kebede B, Tessema GA, et al. Mortality and Disability-Adjusted Life-Years (Dalys) for  
448 Common Neglected Tropical Diseases in Ethiopia, 1990-2015: Evidence from the Global Burden of  
449 Disease Study 2015. *Ethiop Med J* 2017; 55(suppl 1): 3-14.
- 450 6. WHO. Accelerating work to overcome the global impact of neglected tropical diseases: a roadmap  
451 for implementation. Geneva: World Health Organization, 2012.
- 452 7. MASTER PLAN For NEGLECTED TROPICAL DISEASES IN MALAWI 2012-2016, Ministry of  
453 Health, Government of Malawi.
- 454 8. Aenowo AF, Oyinloye BE, Ogunyinka BI, Kappo AP. Impact of human schistosomiasis in sub-Saharan

- 455 Africa. *Braz J Infect Dis*. 2015 Mar-Apr; 19(2): 196-205.
- 456 9. Schistosomiasis Control Programme Ten-Year Plan of Action 1991 to 2000, Ministry of Health,  
457 Republic of Malawi.
- 458 10. World Health Organization JOINT STATEMENT Unicef, Prevention and control of schistosomiasis  
459 and soil-transmitted helminthiasis, WHO/CDS/CPE/PVC/2004.9.
- 460 11. Peter Steinmann, Jennifer Keiser, Robert Bos, et al. Schistosomiasis and water resources  
461 development: systematic review, meta-analysis, and estimates of people at risk. *Lancet* 2006; volume 6:  
462 411-425.
- 463 12. Charlotte W Stecher, Moussa Sacko, Henry Madsen, et al. Anemia and growth retardation associated  
464 with *Schistosoma haematobium* infection in Mali: a possible subtle impact of a neglected tropical disease.  
465 *Trans R Soc Trop Med Hyg* 2017; 111: 144-153.
- 466 13. Tchuente LA, Shaw DJ, Polla L, et al. Efficacy of praziquantel against *Schistosoma haematobium*  
467 infection in children. *Am J Trop Med Hyg* 2004 Dec; 71 (6): 778-82.
- 468 14. International Labour Organization (ILO) 2000. Chapter IV Safety and health practice in agriculture.  
469 In: Report VI( i ) International Labour Conference 88<sup>th</sup> Session 2000, Geneva pp 100-175.
- 470 15. ILO List of Occupational Diseases (revised 2010), International Labour Organization.
- 471 16. MK Boachie. Health and Economic Growth in Ghana: An Empirical Investigation. *Fudan Journal of*  
472 *the Humanities and Social Sciences*, 10(2): 253-2650
- 473 17. Malawi Labour Force Survey 2013. National Statistical Office, Zomba, Malawi. April 2014.
- 474 18. Debbie Palmer. Tackling Malawi's Human Resources Crisis. *Reproductive Health Matters* 2006;  
475 14(27): 27-39.
- 476 19. Malawi Global Fund Coordinating Committee. An Integrated Response to HIV/AIDS and Malaria:  
477 Application to the Global Fund. National AIDS Commission. Lilongwe: Government of Malawi, 2002.
- 478 20. National Statistics Office, Malawi. 1998 Integrated Household Survey: Summary Report. Zomba:  
479 National Statistics Office, 2000.
- 480 21. Poole H, Terlouw DJ, Naunje A, et al. Schistosomiasis in pre-school-age children and their mothers in  
481 Chikhwawa district, Malawi with notes on characterization of schistosomes and snails. *Parasit Vectors*  
482 2014; 7: 153.
- 483 22. Bowie C, Purcell B, Shaba B, et al. A national survey of the prevalence of Schistosomiasis and soil  
484 transmitted helminths in Malawi. *BMC Infectious Diseases* 2004; 4: 49.
- 485 23. Saathoff E, Olsen A, Magnussen P, et al. Patterns of *Schistosoma haematobium* infection, impact of  
486 praziquantel treatment and re-infection after treatment in a cohort of school children from rural Kwa  
487 Zulu-Natal/South Africa. *BMC Infectious Diseases* 2004; 4: 40.
- 488 24. Midzi N, Mtapuri-Zinyowera S, Mapingure MP, et al. Knowledge attitudes and practices of grade  
489 three primary school children in relation to Schistosomiasis, soil transmitted helminthiasis and Malaria in  
490 Zimbabwe. *BMC Infectious Diseases* 2011; 11: 169.
- 491 25. Francisca Mutapi. Changing Policy and Practice in the Control of Pediatric Schistosomiasis.  
492 *PEDIATRICS* 2015; Volume 135 (3): 536-544.



- 493 26. Randall AE, Perez MA, Floyd S, et al. Patterns of helminth infection and relationship to BCG  
494 vaccination in Karonga District Northern Malawi. *Trans R Soc Trop Med Hyg* 2002; 96: 29-33.
- 495 27. Helen Poole, Diane J Terlouw, Andrew Naunje, et al. Schistosomiasis in pre-school-age children and  
496 their mothers in Chikhwawa district, Malawi with notes on characterization of schistosomes and snails.  
497 *Parasites & Vectors* 2014; 7: 153.
- 498 28. Moyo VB, Changadeya W, Chiotha S, Sikawa D. Urinary schistosomiasis among preschool children  
499 in Malengachanzi, Nkhotakota District, Malawi: Prevalence and risk factors. *Malawi Medical Journal*  
500 2016; 28(1): 10-14.
- 501 29. Michael G Chipeta, Bagrey Ngwira, Lawrence N Kazembe. Analysis of Schistosomiasis  
502 haematobium Infection Prevalence and Intensity in Chikhwawa, Malawi: An Application of a Two Part  
503 Model. *PLOS Neglected Tropical Diseases* 2013; Volume 7, Issue 3: e2131.
- 504 30. Austin HN Mtethiwa, Gamba Nkwengulila, Jared Bakuza, et al. Extent of morbidity associated with  
505 schistosomiasis infection in Malawi: a review paper. *Infectious Diseases of Poverty* 2015; 4: 25.
- 506 31. United Nations, Department of Economic and Social Affairs, Population Division. *World Population*  
507 *Prospects: The 2015 Revision*.
- 508 32. Nathan C Lo, Isaac I Bogoch, Brian G Blackburn, et al. Comparison of community-wide, integrated  
509 mass drug administration strategies for schistosomiasis and soil-transmitted helminthiasis: a  
510 cost-effectiveness modeling study. *Lancet Glob Health* 2015; 3: e629-38.
- 511 33. EC Faust, HE Meleney. Studies on schistosomiasis japonica. *American Journal of hygiene* 1924; 3:  
512 295-321.
- 513 34. Peter Makaula, John R Sadalaki, Adamson S Muula, et al. Schistosomiasis in Malawi: a systematic  
514 review. *Parasites & Vectors* 2014; 7: 570.
- 515 35. Khurana P, Morad N, Khan AR, et al. Impact of schistosomiasis of urinary bladder cancer in the  
516 southern province of Saudi Arabia: review of 60 cases. *J Trop Med Hyg* 1992; 95: 149-151.
- 517 36. Koraitim NM, Metwalli NE, Atta MA, El-Sadr AA. Changing age incidence and pathological types of  
518 *Schistosoma*-associated bladder carcinoma. *J Urol* 1995; 154: 1714-1716.
- 519 37. Koroltchouk V, Stanley K, Stjernsward J, Mott K. Bladder cancer: approaches to prevention and  
520 control. *Bull. WHO* 1987; 65: 513-520.
- 521 38. Oliver J Brady, Hannah C Slater, Peter Pemberton-Ross, et al. Role of mass drug administration in  
522 elimination of *Plasmodium falciparum* malaria: a consensus modeling study. *Lancet Glob Health* 2017; 5:  
523 e680-87.
- 524 39. Savioli L, Dixon H, Kisumku UM, Mott KE. Control of morbidity due to *Schistosoma haematobium*  
525 on Pemba island; selective population chemotherapy of schoolchildren with haematuria to identify  
526 high-risk localities. *Trans R Soc Trop Med Hyg* 1989 Nov-Dec; 83(6): 805-10.
- 527 40. Guyatt H, Evans D, Lengeler C, Tanner M. Controlling schistosomiasis: the cost-effectiveness of  
528 alternative delivery strategies. *Health Policy Plan* 1994 Dec; 9(4): 385-95.
- 529 41. Fatiregun AA, Osungbade KO, Olumide AE. Cost-effectiveness of screening methods for urinary  
530 schistosomiasis in a school-based control programme in Ibadan, Nigeria. *Health Policy* 2009 Jan; 89(1):

531 72-7.

532 42. Siziya S, Mushanga M, Marufu T, Mudyarabikwa O. Diagnostic and cost comparisons of a  
533 questionnaire against a chemical reagent strip test in identifying high risk communities for *Schistosoma*  
534 *haematobium* infection in northern Zambia. *Cent Afr J Med* 1996 Feb; 42(2): 40-2.

535 43. Stephenson LS, Lantham MC, Kinoti SN, Oduori ML. Sensitivity and specificity of reagent strips in  
536 screening of Kenyan children for *Schistosoma haematobium* infection. *Am J Trop Med Hyg* 1984 Sep;  
537 33(5): 862-71.

538 44. Krauth SJ, Greter H, Stete K, et al. All that is blood is not schistosomiasis: experiences with reagent  
539 strip testing for urogenital schistosomiasis with special consideration to very-low prevalence settings.  
540 *Parasites & Vectors* 2015; 8: 584.

541 45. Dawaki S, Al-Mekhlafi HM, Ithoi I, et al. The Menace of Schistosomiasis in Nigeria: Knowledge,  
542 Attitude, and Practices Regarding Schistosomiasis among Rural Communities in Kano State. *PLoS ONE*.  
543 2015 Nov 25; 10(11): e0143667.
